# Supplementary material
Source: Springer Nature journal article supplement (https://www.springermedizin.de/resource/supplementary/12885_2007_1070_MOESM1_ESM.pdf/9471032)

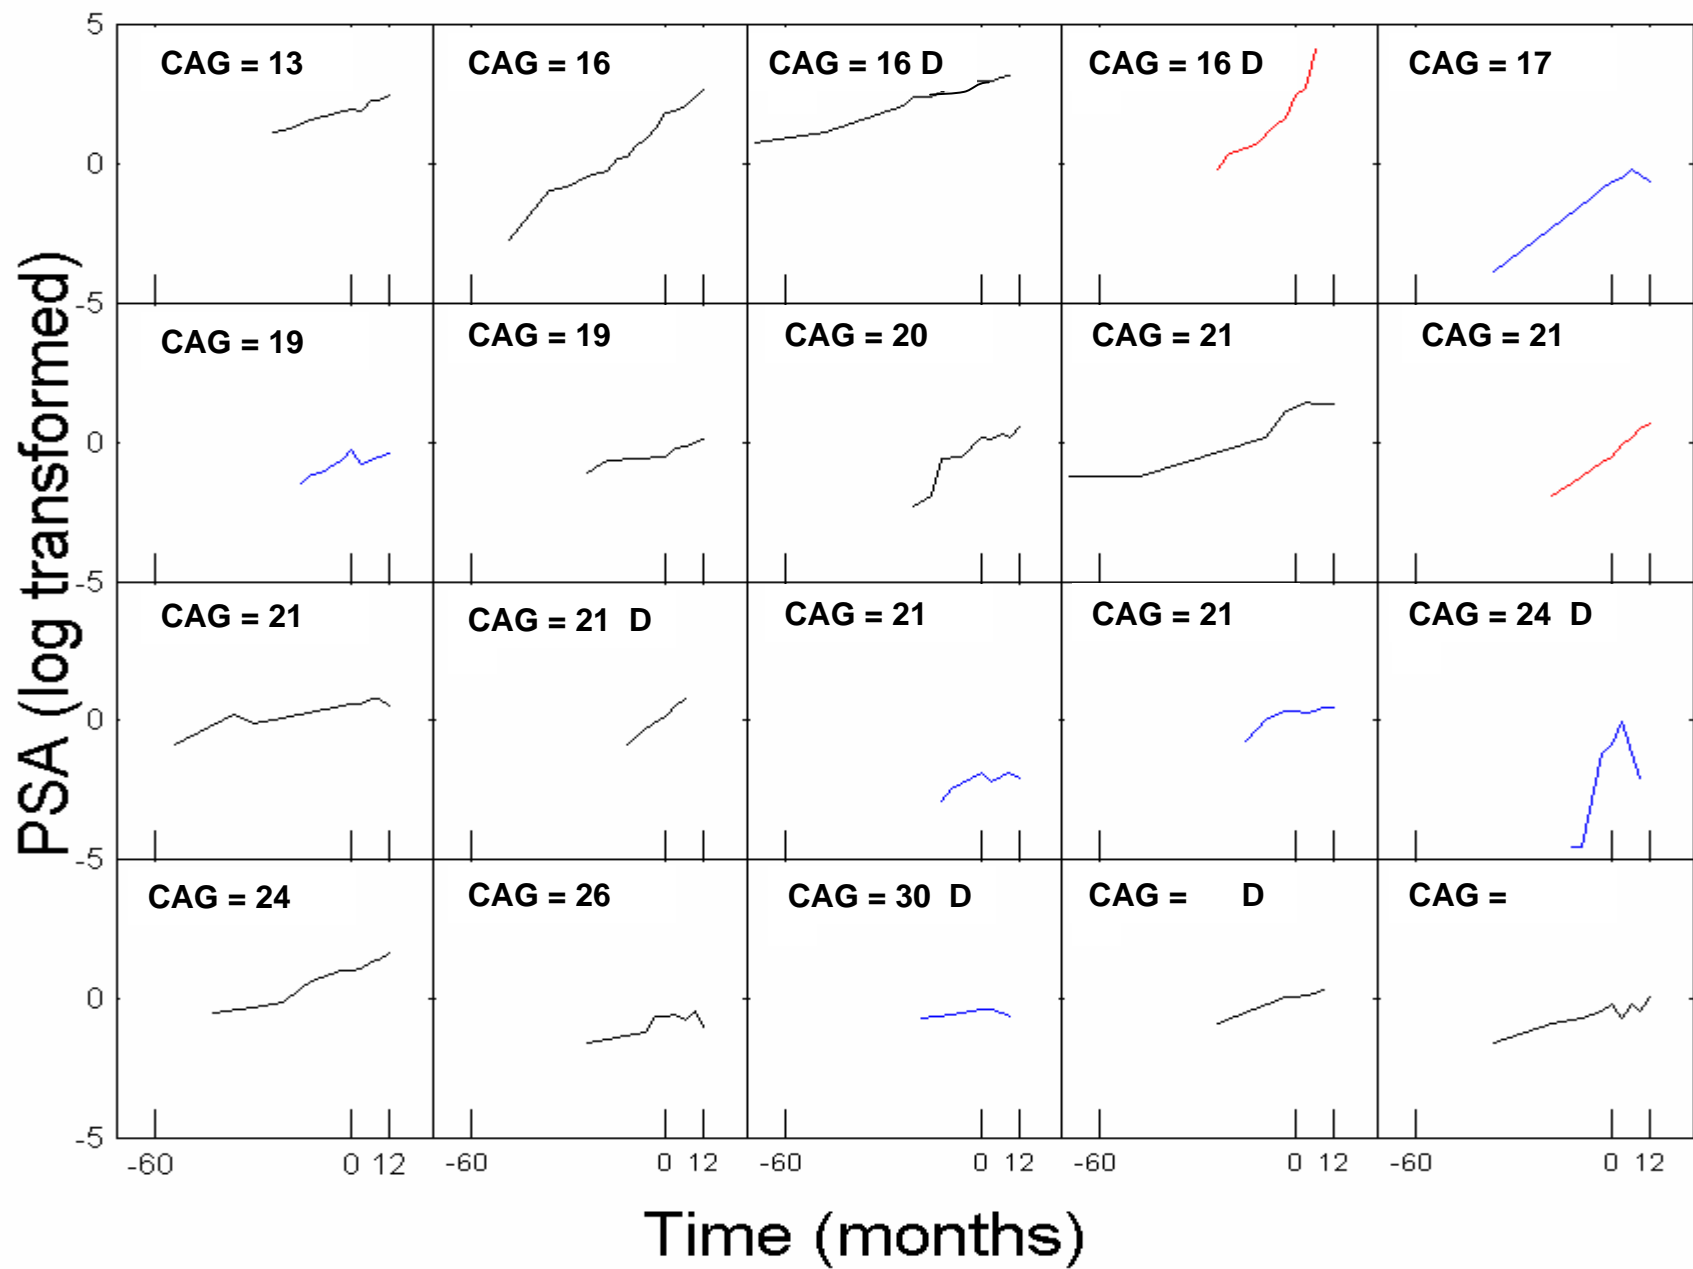

Supplement: MOESM1 [file 9471032]
